# Supplementary material for: Energy crisis precedes global metabolic failure in a novel Caenorhabditis elegans Alzheimer Disease model
Source: PubMed Central journal article supplement (PMC5031964; doi:10.1038/srep33781), 2016-09-22
Supplement: srep33781-s1.pdf [file srep33781-s1.pdf]

**Title: Energy crisis precedes global metabolic failure in a novel *Caenorhabditis elegans* Alzheimer Disease model**

**Author list: Fong Sheng<sup>1\*</sup>, Emelyne Teo<sup>2\*</sup>, Ng Li Fang<sup>3</sup>, Chen Ce-Belle<sup>4</sup>, Lakshmi Narayanan Lakshmanan<sup>5</sup>, Tsoi Sau Yee<sup>3</sup>, Philip Keith Moore<sup>2</sup>, Takao Inoue<sup>4</sup>, Barry Halliwell<sup>4</sup>, Jan Gruber<sup>3,4#</sup>**

**<sup>1</sup>Internal Medicine Residency Programme, SingHealth Group, Singapore <sup>2</sup>NUS Graduate School for Integrative Sciences and Engineering, National University of Singapore, Singapore <sup>3</sup>Science Division, Yale-NUS College, Singapore <sup>4</sup>Department of Biochemistry, National University of Singapore, Singapore Institute of Chemical and Bioengineering, ETH Zurich, Switzerland**

**\*Contributed equally to this work.**

**#Corresponding author. Email: [bchjg@nus.edu.sg](mailto:bchjg@nus.edu.sg)**

## Supplementary Tables

**Table S1. Transgenic *C. elegans* strains expressing human A $\beta$**

| Strain            | Type of expression                  | Location of expression    | Type of A $\beta$                 | Reference               |
|-------------------|-------------------------------------|---------------------------|-----------------------------------|-------------------------|
| CL2006            | Constitutive                        | Muscle                    | A $\beta_{3-42}$                  | Link 1995               |
| CL4176            | Inducible (by temperature up-shift) | Muscle                    | A $\beta_{3-42}$                  | Link et al. 2003        |
| GMC101            | Inducible (by temperature up-shift) | Muscle                    | A $\beta_{1-42}$                  | McColl et al. 2012      |
| CL2355            | Inducible (by temperature up-shift) | Neuron                    | A $\beta_{3-42}$                  | Link 2005               |
| FDX (ses25)       | Constitutive                        | ASE (chemosensory neuron) | A $\beta_{3-42}$                  | Duan & Sesti 2013       |
| UA166             | Constitutive                        | Glutamnergic neuron       | A $\beta_{3-42}$                  | Treusch et al. 2012     |
| <i>Our strain</i> | <i>Constitutive</i>                 | <i>Neuron</i>             | <i>A<math>\beta_{1-42}</math></i> | <i>Fong et al. 2015</i> |

**Table S2. Summary of lifespan studies conducted.**

| Study | Median LSP (days)             | Log-rank test     | Mean LSP (days)                   | t-test            | Max LSP (days)                    | t-test            | N                               |
|-------|-------------------------------|-------------------|-----------------------------------|-------------------|-----------------------------------|-------------------|---------------------------------|
| 1     | Control: 17<br>A $\beta$ : 13 | <b>P&lt;0.001</b> | Control: 15.9<br>A $\beta$ : 13.4 | <b>P&lt;0.001</b> | Control: 22.8<br>A $\beta$ : 19.9 | <b>P&lt;0.01</b>  | Control: 168<br>A $\beta$ : 122 |
| 2     | Control: 18<br>A $\beta$ : 13 | <b>P&lt;0.001</b> | Control: 17.4<br>A $\beta$ : 13.3 | <b>P&lt;0.001</b> | Control: 25.5<br>A $\beta$ : 22.1 | <b>P&lt;0.001</b> | Control: 137<br>A $\beta$ : 107 |
| 3     | Control: 17<br>A $\beta$ : 12 | <b>P&lt;0.001</b> | Control: 16.7<br>A $\beta$ : 12.1 | <b>P&lt;0.001</b> | Control: 24.2<br>A $\beta$ : 19.1 | <b>P&lt;0.001</b> | Control: 88<br>A $\beta$ : 88   |

## Supplementary Figures

A)

Sequences used in this study:

Nucleotide

```
ggtacc atg cat aag gtt ttg ctg gca ctg ttc ttt atc ttt
      ctg gca cca gca gga aca GAT GCT GAT GCA GAA TTT
      CGA CAT GAT TCA GGA TAT GAA GTT CAT CAT CAA AAA
      TTG GTG TTC TTT GCA GAA GAT GTG GGA TCA AAT AAA
      GGA GCA ATT ATT GGA CTC ATG GTG GGA GGA GTT GTC
      ATT GCT TGA actagt
```

Amino acid (predicted) – residues 1 – 42 of human A $\beta$

```
kpnI - met-his-lys-val-leu-leu-ala-leu-phe-phe-ile-phe-
      leu-ala-pro-ala-gly-thr-ASP-ALA-ASP-ALA-GLU-PHE-
      ARG-HIS-ASP-SER-GLY-TYR-GLU-VAL-HIS-HIS-GLN-LYS-
      LEU-VAL-PHE-PHE-ALA-GLU-ASP-VAL-GLY-SER-ASN-LYS-
      GLY-ALA-ILE-ILE-GLY-LEU-MET-VAL-GLY-GLY-VAL-VAL-
      ILE-ALA-stop - speI
```

B)

*C. elegans* Genetic Code:

|     |     |      |     |     |      |     |      |      |     |      |      |
|-----|-----|------|-----|-----|------|-----|------|------|-----|------|------|
| TTT | Phe | 0.50 | TCT | Ser | 0.21 | TAT | Tyr  | 0.56 | TGT | Cys  | 0.55 |
| TTC | Phe | 0.50 | TCC | Ser | 0.13 | TAC | Tyr  | 0.44 | TGC | Cys  | 0.45 |
| TTA | Leu | 0.12 | TCA | Ser | 0.25 | TAA | Stop | 0.44 | TGA | Stop | 0.39 |
| TTG | Leu | 0.23 | TCG | Ser | 0.15 | TAG | Stop | 0.17 | TGG | Trp  | 1.00 |
| CTT | Leu | 0.24 | CCT | Pro | 0.18 | CAT | His  | 0.61 | CGT | Arg  | 0.21 |
| CTC | Leu | 0.17 | CCC | Pro | 0.09 | CAC | His  | 0.39 | CGC | Arg  | 0.10 |
| CTA | Leu | 0.09 | CCA | Pro | 0.53 | CAA | Gln  | 0.66 | CGA | Arg  | 0.23 |
| CTG | Leu | 0.14 | CCG | Pro | 0.20 | CAG | Gln  | 0.34 | CGG | Arg  | 0.09 |
| ATT | Ile | 0.53 | ACT | Thr | 0.33 | AAT | Asn  | 0.62 | AGT | Ser  | 0.15 |
| ATC | Ile | 0.31 | ACC | Thr | 0.18 | AAC | Asn  | 0.38 | AGC | Ser  | 0.10 |
| ATA | Ile | 0.16 | ACA | Thr | 0.34 | AAA | Lys  | 0.59 | AGA | Arg  | 0.29 |
| ATG | Met | 1.00 | ACG | Thr | 0.15 | AAG | Lys  | 0.41 | AGG | Arg  | 0.08 |
| GTT | Val | 0.39 | GCT | Ala | 0.36 | GAT | Asp  | 0.68 | GGT | Gly  | 0.20 |
| GTC | Val | 0.22 | GCC | Ala | 0.20 | GAC | Asp  | 0.33 | GGC | Gly  | 0.12 |
| GTA | Val | 0.16 | GCA | Ala | 0.31 | GAA | Glu  | 0.62 | GGA | Gly  | 0.59 |
| GTG | Val | 0.23 | GCG | Ala | 0.13 | GAG | Glu  | 0.38 | GGG | Gly  | 0.08 |

Fields: Triplet | Amino acid | Fraction

C)

```
1  GATGCAGAAATTCGACATGATTCAGGATATGAAGTTCATCATCAAAAATTGGTGTTCCTT 60
1  GATGCAGAAATTCGACATGATTCAGGATATGAAGTTCATCATCAAAAATTGGTGTTCCTT 60
61  GCAGAAGATGTGGGATCAAATAAAGGAGCAATTATTGGACTCATGGTGGGAGGAGTTGTC 120
61  GCAGAAGATGTGGGATCAAATAAAGGAGCAATTATTGGACTCATGGTGGGAGGAGTTGTC 120
121 ATTGCTTGA 129
121 ATTGCTTGA 129
```

**Figure S1. A) A $\beta$ <sub>1-42</sub> nucleotide sequence used in minigene construction.** Additional nucleotides, gatgct, encoding aspartate and alanine, at the N-terminus, to prevent formation of truncated A $\beta$ <sub>3-42</sub>. **B) *C. elegans* genetic code frequency.** Codon usage was optimized by using nematode codons with highest frequencies to encode the A $\beta$ <sub>1-42</sub> minigene. **C) Sequence alignment of DNA identity obtained from sequencing.** The A $\beta$  sequence detected from the transgenic nematodes matches with the codon optimized full length A $\beta$ <sub>1-42</sub> nucleotide sequence.
